# Supplementary material for: Estrogen-related receptor alpha (ERRα) promotes gastrointestinal stromal tumor progression and epithelial-mesenchymal transition through Wnt/β-catenin
Source: Research Square preprint supplement (doi:10.21203/rs.3.rs-9930164/v1), 2026-06-24
Supplement: Supplementary file 2 [file a4c231c180a6316351cfb116.xlsx]

## Sheet: Sheet1
PCR Taqman probes
Gene	Species	Accession/Probe ID	Full Name
Esr1	Mouse	mm00433149_m1	Estrogen Receptor Alpha
ESR1	Human	Hs01046813_m1	Estrogen Receptor Alpha
ESRRA	Human	Hs00607062	Estrogen-Related Receptor Alpha
CTNNB1	Human	Hs00355049_m1	Catenin Beta-1
CCN2	Human	Hs00170014_m1	Connective Tissue Growth Factor
CADM1	Human	Hs00942508_m1	Cell Adhesion Molecule 1
TAGLN	Human	Hs01038777_g1	Transgelin
IGFBP3	Human	Hs00181211_m1	Insulin-Like Growth Factor Binding Protein 3
NNMT	Human	Hs00196287_m1	Nicotinamide N-Methyltransferase
INHBA	Human	Hs01081598_m1	Inhibin Beta A
KIT	Human	Hs00174029_m1	KIT Proto-Oncogene Receptor Tyrosine Kinase
WNT11	Human	Hs1045906_m1	Wnt Family Member 11
AXIN2	Human	Hs00195591_m1	Axin 2
SNAI1	Human	Hs00610344_m1	Snail Family Transcriptional Repressor 1
DKK4	Human	Hs00205290_m1	Dickkopf-4
FOXF1	Human	Hs00230962_m1	forkhead box F1
ETV1	Human	Hs00951941_m1	ETS variant 1
