# Supplementary material for: Estrogen-related receptor alpha (ERRα) promotes gastrointestinal stromal tumor progression and epithelial-mesenchymal transition through Wnt/β-catenin
Source: Research Square preprint supplement (doi:10.21203/rs.3.rs-9930164/v1), 2026-06-24
Supplement: Supplementary file 3 [file f6f107579765c0854027be65.xlsx]

## Sheet: Sheet1
Gene	siNC S1	siNC S2	siNC S3	ERRa KD S4	ERRa KD S5	ERRa KD S6	siNC + IM S7	siNC + IM S8	siNC + IM S9
ABI3BP	1309.41	1231.97	1463.44	1303.73	1327.57	1113.45	5968.14	4197.7	3876.43
ACTA2	15573.8	16899.5	16171.9	10967.5	10211.6	11232.4	18619.5	19130.6	19490.6
ADAM12	79.6076	68.5579	47.2078	86.7438	73.6577	95.7694	38.6824	43.0024	43.6056
ANPEP	7.32024	1.03876	4.88357	6.01195	2.59969	3.15723	4.42084	5.51313	5.59046
APLP1	1593.98	1753.42	1725.53	1858.55	1535.55	1708.06	2800.6	2468.78	2554.84
AREG	1.83006	0	0.813928	0	0	0	0	1.10263	0
BASP1	67618.9	69922.8	69552.6	67592.3	62404.6	61914.4	59722.3	57304.6	63290.7
BDNF	760.39	704.277	673.118	520.463	565.865	516.734	450.926	505.003	578.054
BGN	592.025	604.556	663.351	523.898	468.81	507.262	1027.85	770.736	940.316
BMP1	735.684	835.16	807.416	736.893	639.523	711.43	1401.41	1157.76	1188.53
CADM1	2075.29	2127.37	2305.86	1167.18	1270.38	1133.45	3775.4	4049.95	3679.64
CALD1	38516.4	34749.5	38660.7	33488.3	37512.6	31405	38891.3	36329.3	34987.4
CALU	46340.8	42431.1	46956.3	45636.7	55692.2	46918.6	48218.2	50263.2	46021.8
CAP2	1973.72	1897.81	1924.12	1971.06	2145.61	2081.67	2376.2	2477.6	2446.39
CAPG	9.1503	10.3876	13.0228	20.6124	12.1319	9.47169	45.3137	36.3867	30.1885
CCN1	11240.2	10139.3	10314.1	7856.76	7323.31	6842.77	7029.14	6487.85	7822.18
CCN2	44033.1	40786.8	41791.9	28886.5	29372.1	26699.7	26153.7	24171.8	28229.6
CD44	35036.5	31619.7	34224.8	34638.3	37060.2	32033.3	25964.7	24378	26522.3
CD59	5116.85	4782.43	5072.4	4046.04	4879.61	4349.61	6405.8	7579.45	7011.56
CDH11	26617.3	26240	26992.3	21897.2	22418.8	20716.7	27505.4	27725.5	27533
CDH2	20.1307	12.4651	13.0228	9.44734	12.9984	12.6289	18.7886	13.2315	19.0076
CDH6	0	1.03876	0	0	0	0	0	0	0
COL11A1	0	0	0	0	0	0	0	0	1.11809
COL12A1	13388.7	12375.7	13731	10326.8	11386.6	9653.76	40830.9	32852.7	28859.1
COL16A1	879.344	955.656	1034.5	843.39	910.756	775.627	2789.55	2232.82	2081.89
COL1A1	668.887	688.696	668.235	998.842	831.033	826.142	1085.32	757.504	893.356
COL1A2	9.1503	13.5038	6.51142	6.8708	14.7315	5.26205	24.3146	20.9499	16.7714
COL3A1	131827	129686	140608	131422	140745	129156	413798	376293	336933
COL4A1	11120.4	10332.5	11858.9	11018.2	11818.2	9929.49	29208.5	21859.6	20646.7
COL4A2	3381.04	3472.56	4052.55	3695.63	3718.42	3324.56	13083.5	7513.3	7884.79
COL5A1	4154.24	4396.02	4881.94	4241.86	4136.1	3852.87	16173.7	11106.8	10701.3
COL5A2	4284.17	3902.61	4381.37	3628.64	4063.31	3445.59	10015.4	9548.74	8629.44
COL5A3	581.959	557.812	662.537	559.97	519.937	527.258	1361.62	1016.62	1167.29
COL6A2	3293.19	3535.93	3935.34	3116.76	2935.91	2874.13	12245.7	8577.33	8728.95
COL6A3	83.2677	74.7905	70.8117	60.1195	82.3234	73.6687	113.837	87.1075	92.8017
COL7A1	3.66012	5.19378	2.44178	1.7177	2.59969	8.41928	3.31563	1.10263	4.47237
COL8A2	13.7255	15.5813	13.0228	0.858849	3.46625	12.6289	85.1013	93.7232	61.4951
COLGALT1	21495.9	23448.9	22973.9	23583.1	23485.6	23650.8	28655.9	23487	24867.5
COMP	0	0	0	0	0	0	0	0	1.11809
COPA	24318.8	24969.6	24433.3	24681.6	25441.4	24874.8	26012.2	28304.4	27684
CRLF1	367.842	391.611	388.243	328.081	273.833	251.526	515.028	415.69	451.709
CTHRC1	98.8233	126.728	121.275	121.957	129.984	98.9266	150.309	148.855	152.061
CXCL1	0	0	0.813928	0	0	0	0	0	0
CXCL12	932.416	908.912	941.714	575.429	617.858	672.49	917.325	857.843	977.213
CXCL6	0	0	0	0	0	0	0	0	0
CXCL8	5.49018	11.4263	13.0228	3.4354	4.33281	3.15723	0	0	0
DAB2	7557.23	7067.7	7112.1	6729.94	6974.09	6424.97	6091.92	6266.23	6235.6
DCN	14579.2	14234.1	14612.4	12684.3	14171.7	12731	24520.2	27130.1	23945.1
DKK1	0	0	0	0	0	0	0	0	0
DPYSL3	37.5162	33.2402	46.3939	26.6243	45.9278	42.0964	16.5782	15.4368	16.7714
DST	3091.89	2824.38	3147.46	2327.48	2565.02	2061.67	3470.36	2604.4	2691.25
ECM1	3295.02	3655.38	3669.19	3785.81	3384.79	3659.23	5784.68	4683.96	5040.36
ECM2	2.74509	7.27129	4.88357	0.858849	5.19937	6.31446	1.10521	0	3.35428
EDIL3	17.3856	29.0852	16.2786	41.2248	36.3956	18.9434	62.997	66.1576	92.8017
EFEMP2	1558.3	1789.78	1533.44	1451.46	1237.45	1415.49	3084.64	2919.75	3156.38
ELN	28373.3	32137	30206.5	23048.1	20898.9	23097.3	76405.5	71527.4	73793
EMP3	1391.76	1395.05	1345.42	1345.82	1203.65	1287.1	1173.73	1151.14	1387.55
ENO2	106.143	79.9842	91.1599	71.2845	72.7912	90.5073	69.6283	65.0549	93.9198
FAP	5.49018	4.15503	6.51142	3.4354	8.66562	9.47169	16.5782	13.2315	17.8895
FAS	2273.85	2125.3	2331.09	2304.29	2728.8	2325.83	974.796	978.029	1044.3
FBLN1	387.058	501.719	458.241	358.999	354.424	369.396	2067.85	1629.68	1528.43
FBLN2	17.3856	36.3565	26.8596	8.58849	14.7315	28.4151	97.2586	86.0048	84.975
FBLN5	4561.43	4664.02	4544.16	3876.85	4145.63	3682.38	10377.9	9256.55	9366.26
FBN1	35919.5	34765.1	36891.3	36045.9	39828.9	35032.6	78537.4	63803.5	58743.5
FBN2	87390.9	81786.5	88933	94830.7	102428	91918.6	240150	194048	186989
FERMT2	5220.25	5016.15	5154.6	3857.09	4139.57	3584.51	4725.88	5175.73	4914.02
FGF2	1413.72	1266.24	1438.21	1155.15	1318.91	1147.13	837.75	873.28	826.27
FLNA	102300	107573	107654	121565	116375	112618	131840	102479	113972
FMOD	0	0	0.813928	0	0	0	0	0	2.23619
FN1	14192.1	13455	15690.9	13380	14471.6	12904.7	47314.1	29885.6	29841.9
FOXC2	214.117	253.457	227.9	326.363	258.235	302.042	114.942	87.1075	130.817
FSTL1	44591.2	42584.9	44769.3	44059	50696.5	44972.7	62750.6	66005.4	60361.3
FSTL3	731.109	814.385	742.302	590.03	533.802	557.778	828.908	729.939	928.017
FUCA1	1200.52	1184.18	1153.34	949.029	1044.21	901.916	1762.81	1948.34	1711.8
FZD8	5793.97	6458.99	5825.28	6782.33	5753.1	6059.78	5625.52	5153.68	5872.22
GADD45A	597.515	588.975	550.215	490.403	472.276	427.279	227.673	233.757	215.792
GADD45B	1169.41	1143.67	1167.99	1137.12	1134.33	1137.66	692.967	631.805	702.162
GAS1	1983.79	2074.4	1968.89	1882.6	1779.05	1638.6	2260.16	2403.73	2476.58
GEM	639.606	578.587	683.699	473.226	450.612	420.964	478.556	495.079	488.606
GJA1	9.1503	7.27129	6.51142	5.1531	6.06593	7.36687	1.10521	1.10263	3.35428
GLIPR1	1472.28	1282.86	1347.86	1258.21	1366.57	1220.8	946.061	900.846	1125.92
GPC1	3736.07	3826.78	4006.15	3616.62	3264.34	3244.58	5816.73	4164.62	5044.83
GPX7	0	3.11627	0	0.858849	0	1.05241	1.10521	3.30788	1.11809
GREM1	2.74509	8.31005	7.32535	2.57655	4.33281	4.20964	1.10521	14.3341	5.59046
HTRA1	76.8625	74.7905	92.7877	55.8252	68.4584	58.935	279.618	278.964	261.634
ID2	120.784	118.418	122.089	91.038	94.4552	95.7694	235.41	233.757	230.327
IGFBP2	7951.61	9587.72	8715.54	7776.88	7003.55	7692.07	11898.7	10787	11250.2
IGFBP3	54049.9	52177.8	50260.8	25334.3	25601.7	22491.1	58877.9	55918.6	63746.9
IGFBP4	1291.11	1611.11	1443.91	1122.52	992.213	1093.45	1532.93	1400.34	1574.27
IL15	34.7711	35.3177	33.371	36.0717	37.2622	39.9916	41.998	25.3604	32.4247
IL32	568.234	606.634	606.376	664.75	518.204	610.398	545.974	481.848	639.549
IL6	246.143	233.72	266.968	197.535	223.573	204.168	146.993	188.549	186.721
INHBA	388.888	335.518	437.893	231.031	203.642	217.849	66.3127	79.3891	83.8569
ITGA2	940.651	887.098	1066.25	904.369	922.888	912.44	1022.32	955.977	948.143
ITGA5	18710.5	19317.8	19562.8	20987.7	20372	20275.7	14588.8	12786.1	14558.7
ITGAV	4946.65	4347.2	4861.59	4680.73	5346.69	4486.43	5925.04	6598.12	5915.83
ITGB1	8059.59	7600.58	8335.43	7227.22	8741.01	7463.7	13007.2	13275.6	11483.9
ITGB3	149.15	110.108	161.158	81.5907	94.4552	92.6121	212.201	200.678	213.556
ITGB5	8174.88	8544.81	8826.23	7504.63	7487.96	7594.19	10104.9	8798.96	9399.8
JUN	3441.43	3719.79	3422.57	2525.02	2364.85	2334.25	2076.69	1968.19	2361.41
LAMA1	0	0	0.813928	0	0	0	0	3.30788	0
LAMA2	238.823	186.976	221.388	195.818	237.438	208.377	234.305	284.478	256.043
LAMA3	59.477	54.0153	45.5799	82.4496	57.1931	77.8784	77.3648	65.0549	62.6132
LAMC1	19887.3	19527.6	20430.4	17089.4	18352.9	16522.8	36052	30775.4	29559
LAMC2	9.1503	6.23254	9.76713	12.0239	9.53218	3.15723	6.63127	6.61576	7.82665
LGALS1	24305.9	25949.2	24321	23982.5	23512.4	24105.5	21826.8	25123.3	24955.8
LOX	30.196	30.1239	26.8596	15.4593	20.7975	19.9958	16.5782	25.3604	20.1257
LOXL1	969.932	1099	976.713	775.541	636.056	801.937	2095.48	2016.7	2081.89
LOXL2	563.659	550.541	586.842	492.98	461.877	437.803	864.275	764.12	692.099
LRP1	8029.39	8525.07	9207.15	8273.3	7435.1	7555.26	32593.8	19802.1	21189
LRRC15	2.74509	1.03876	0.813928	1.7177	0	5.26205	2.21042	3.30788	2.23619
LUM	41774.8	40227.9	42536.7	37618.5	44919.1	39330.7	53472.3	60399.7	51735.3
MAGEE1	135.424	148.542	133.484	54.1075	68.4584	48.4109	212.201	189.652	206.847
MATN2	568.234	667.92	638.933	443.166	506.939	503.052	1689.87	1631.89	1314.88
MATN3	102.483	127.767	103.369	111.65	104.854	90.5073	180.149	195.165	180.013
MCM7	28902.1	31272.8	29144.3	28114.4	26825.3	28408.8	34941.2	35434	37847.4
MEST	134.509	161.007	126.159	93.6146	84.923	87.3501	169.097	220.525	228.091
MFAP5	0	1.03876	0	0	0	0	2.21042	2.20525	2.23619
MGP	519.737	489.254	516.844	416.542	500.006	447.274	1145	1308.82	1139.34
MMP1	866.534	751.021	843.229	479.238	547.667	537.782	358.088	289.991	419.285
MMP14	2.74509	1.03876	0.813928	0.858849	0.866562	2.10482	4.42084	0	0
MMP2	11614.5	11971.7	13317.5	12107.2	12722	11193.4	24473.8	16644.1	17191.8
MMP3	277.254	227.488	262.085	94.4734	154.248	86.2977	71.8387	57.3366	86.0931
MSX1	596.6	705.316	628.352	622.666	490.474	568.302	607.866	646.139	740.177
MYL9	0	0	0	0.858849	0	0	1.10521	0	0
MYLK	2003.92	1885.34	2041.33	1689.36	1769.52	1612.29	4110.28	3737.9	3613.68
NID2	218.692	224.371	240.923	198.394	205.375	219.954	642.128	546.903	580.29
NNMT	396.208	416.541	408.592	200.112	204.509	181.015	154.73	137.828	222.5
NOTCH2	6044.69	5899.1	5864.35	4144.81	3940.26	4098.09	8240.45	7944.42	7868.02
NT5E	8.23527	14.5426	9.76713	10.3062	12.9984	8.41928	29.8407	26.463	21.2438
NTM	1173.07	1162.37	1128.1	1369.86	1444.56	1291.31	1403.62	1236.04	1266.8
OXTR	42.0914	34.279	47.2078	47.2367	34.6625	24.2054	78.47	69.4655	62.6132
P3H1	6172.79	6604.41	6484.56	6156.23	6267.84	6176.6	8924.58	8356.8	8667.45
PCOLCE	747.58	918.261	817.997	668.185	602.26	607.241	937.219	905.256	955.969
PCOLCE2	11715.1	12287.4	12314.7	10682.4	12271.4	11288.2	13190.7	13987.9	13251.6
PDGFRB	4550.44	4804.25	4730.55	4096.71	3932.46	3850.77	6079.77	5439.26	5497.66
PDLIM4	0.91503	0	2.44178	2.57655	0.866562	0	0	0	1.11809
PFN2	10881.5	10482.1	10320.6	9355.45	10114.5	9567.46	9605.39	10237.9	9989.04
PLAUR	463.92	430.045	482.659	330.657	329.293	314.671	267.461	217.217	254.925
PLOD1	12238.5	13518.4	13812.4	12171.6	12251.4	11795.4	22041.2	17623.3	17583.1
PLOD2	23952.7	22113	24356	22210.7	26842.6	22663.7	28617.2	31839.4	28194.9
PLOD3	5911.09	6628.3	6430.03	6453.4	6039.07	6120.82	9221.88	7926.78	8555.64
PMEPA1	785.096	801.92	761.022	929.275	857.896	904.021	984.743	908.564	958.205
PMP22	2085.35	1995.45	2162.61	2652.99	2792.06	2468.96	3980.97	4549.44	4313.6
POSTN	1028.49	947.346	1061.36	1101.05	1308.51	1090.3	2186.11	2350.8	1898.52
PPIB	5081.16	5301.81	4906.36	5440.81	6509.61	5777.73	5561.42	5591.42	5806.25
PRRX1	8.23527	17.6589	12.2089	5.1531	5.19937	5.26205	53.0501	57.3366	48.078
PRSS2	0	0	0	0	0	0	0	0	0
PTHLH	237.908	208.79	198.598	190.665	188.044	158.914	343.721	411.28	417.049
PTX3	3.66012	2.07751	1.62786	0	0	0	0	1.10263	2.23619
PVR	1290.19	1236.12	1300.66	809.036	833.632	725.111	1036.69	793.891	969.386
QSOX1	16903.4	19661.6	18171.7	18016.9	16365.9	18871.8	29415.2	26217.1	27031
RGS4	147.32	165.162	188.017	324.645	300.697	288.36	78.47	105.852	108.455
RHOB	9042.33	9485.92	8556.01	6852.76	6123.12	6436.54	9258.35	9774.78	10409.4
SAT1	437.384	465.363	506.263	301.456	327.56	306.251	138.151	154.368	163.242
SCG2	56.7319	59.2091	56.9749	93.6146	82.3234	65.2495	18.7886	23.1552	20.1257
SDC1	2423.91	2866.97	2639.57	2196.94	2103.15	2203.75	3878.19	3109.41	3570.07
SDC4	2111.89	2011.03	2025.05	1191.22	1142.99	1151.34	1646.76	1802.79	1878.4
SERPINE1	3550.32	3534.89	3574.77	2919.23	2853.59	2816.25	1352.78	1126.88	1332.77
SERPINE2	1019.34	919.299	1032.06	1060.68	1106.6	1119.76	2004.85	2090.58	2155.68
SERPINH1	67201.6	75552.9	71112	55077.2	53307.4	54192.8	81429.7	77887.3	82302.8
SFRP1	23567.5	25762.2	25378.3	26374.4	28432.8	27005.9	45378.9	47405.2	42016.8
SFRP4	998.298	1128.09	929.505	838.237	906.424	913.492	1615.82	1626.37	1492.65
SGCB	3331.62	2991.62	3337.92	2970.76	3545.1	2996.21	3060.33	3038.84	3084.82
SGCD	1424.7	1365.96	1384.49	1189.51	1322.37	1262.89	1913.12	1962.67	1819.14
SGCG	4.57515	8.31005	4.88357	3.4354	5.19937	2.10482	7.73648	13.2315	8.94474
SLC6A8	1938.95	2112.83	1996.56	2433.98	2327.58	2239.53	2567.41	2346.39	2612.98
SLIT2	6633.05	6214.88	6339.68	6179.42	6079.8	5640.92	8721.22	7550.78	8205.68
SLIT3	1692.81	1934.16	1904.59	1701.38	1744.39	1543.89	5156.92	3711.44	3611.44
SNAI2	375.162	409.27	424.87	462.92	506.072	470.428	469.715	493.977	446.119
SNTB1	487.711	510.029	534.75	499.85	585.796	506.209	678.6	678.115	688.745
SPARC	20951.4	21422.3	21524.3	17694.9	18138.9	18212	34238.3	35591.7	34013.5
SPOCK1	2437.64	2510.67	2520.73	1862.84	2228.8	1856.45	4541.31	4799.73	4386.28
SPP1	0.91503	1.03876	0.813928	1.7177	1.73312	3.15723	0	0	2.23619
TAGLN	4609.01	4387.71	4342.3	2798.13	3078.89	2788.89	5479.64	6132.81	6541.96
TFPI2	0	3.11627	2.44178	0	0	0	0	0	0
TGFB1	3561.3	4140.48	3820.58	3856.23	3065.9	3343.51	3272.53	2640.79	3119.48
TGFBI	4034.37	3996.1	3768.48	2011.43	2154.27	2003.79	1244.47	1409.16	1408.8
TGFBR3	3557.64	3320.9	3407.1	4135.36	4454.13	4115.98	2733.19	2983.71	2756.1
TGM2	9837.49	10556.9	10422.3	11962.1	11366.7	11529.2	19130.1	17671.8	18262.9
THBS1	142633	137237	141825	170151	173151	153584	120259	97010.2	106786
THBS2	3.66012	2.07751	5.69749	0.858849	3.46625	3.15723	3.31563	0	2.23619
THY1	40476.4	45736.4	42504.9	43576.3	36885.2	41756.5	41674.2	37393.4	41848
TIMP1	11644.7	11970.6	11630.2	12074.6	10774	11501.8	9816.49	8814.39	10596.2
TIMP3	12901.9	12440.1	12751	15042.7	14901.4	14186.5	10544.8	10175	10836.6
TNC	5789.4	5710.04	6304.68	5694.17	5302.49	4990.53	10709.5	6893.62	7988.77
TNFAIP3	1699.21	1754.46	1842.73	2251.9	2384.78	2325.83	1445.62	1425.7	1324.94
TNFRSF11B	80.5227	82.0618	75.6953	47.2367	57.1931	39.9916	14.3677	5.51313	19.0076
TNFRSF12A	9009.39	9704.06	8884.83	8874.49	6982.75	8489.8	4154.49	3925.35	5038.13
TPM1	12072.9	11700.6	11527.7	10204.8	11268.8	9996.85	12851.4	13825.8	13859.9
TPM2	179.346	142.31	178.25	150.299	136.05	107.346	156.94	124.597	185.603
TPM4	85838.1	82283	86286.1	88440.9	98671.9	85577.8	68512	69345.3	69916.6
VCAM1	74.1174	85.178	86.2763	66.1314	78.8571	78.9308	15.473	23.1552	22.3619
VCAN	16282	14903	16889	16501.1	18767.1	16807	19242.8	15351.9	14538.6
VEGFA	523.397	498.603	547.773	591.747	505.205	490.423	243.146	218.32	218.028
VEGFC	0.91503	2.07751	0	0	0	0	0	0	0
VIM	16923.5	15223	16513.8	14357.4	16990.7	14124.4	15375.7	15389.4	15513.5
WIPF1	1060.52	1200.8	1064.62	873.45	886.493	942.96	1096.37	1092.7	1133.75
WNT5A	8296.58	7670.18	8365.55	10231.5	10675.2	9265.42	5753.73	5297.02	5566.98
